# Supplementary material for: Cross-Species Applications of Peptide Substrate Reporters to Quantitative Measurements of Kinase Activity
Source: PubMed Central journal article supplement (PMC11487760; doi:10.1021/acsmeasuresciau.4c00030), 2024-08-02
Supplement: tg4c00030_si_001.pdf [file tg4c00030_si_001.pdf]

## Supporting Information

Cross-Species Applications of Peptide Substrate Reporters to Quantitative Measurements of

Kinase Activity

Mengqi Jonathan Fan,<sup>a†#</sup> Misha Mehra,<sup>a†</sup> Kunwei Yang,<sup>a§</sup> Rahuljeet S. Chadha,<sup>a§</sup> Sababa Anber,<sup>a</sup>  
and Michelle L. Kovarik<sup>a\*</sup>

<sup>a</sup>Department of Chemistry, Trinity College, 300 Summit St., Hartford, CT 06106 USA

\*Email: michelle.kovarik@trincoll.edu

<sup>†</sup>MJF and MM contributed equally to this paper.

|                                                                         |   |
|-------------------------------------------------------------------------|---|
| Procedure for Western blotting .....                                    | 2 |
| <b>Figure S1.</b> Effect of lysis time (Western blot).....              | 3 |
| <b>Figure S2.</b> Effect of LY294002 treatment (Western blot) .....     | 4 |
| <b>Figure S3.</b> Effect of <i>cARA</i> - mutation (Western blot) ..... | 5 |
| <b>Figure S4.</b> Normalized data for Figure 4a.....                    | 6 |

**Procedure for Western blotting.** Western blotting for phosphorylated PKB substrates from *D. discoideum* lysates was performed as described previously.<sup>1</sup> Cells were lysed in 5× SDS lysis loading buffer (250 mM Tris·HCl, pH 6.8, 10% SDS, 30% v/v glycerol, 10 mM DTT, 0.05% w/v bromophenol blue). Lysates and a standard protein ladder (Thermo Scientific™ PageRuler™ Plus, 10-250 kDa) were loaded onto a precast 4 to 12%, Tris-Glycine gel (Invitrogen™ Novex™ WedgeWell™) and run at 220 V in running buffer for 35-40 min. Bands were transferred to PVDF membrane, incubated with blocking buffer (5% w/v nonfat dry milk in TBST) for 1 h, with primary antibody (Phospho-Akt Substrate (RXXS\*/T\*) (110B7E) Rabbit mAb, Cell Signaling Technology) overnight, and with secondary antibody (HRP-linked, anti-rabbit IgG, Cell Signaling Technology) at room temperature for 1 h. ECL reagent (Thermo Scientific/Pierce) was then added, and chemiluminescence was recorded using an Azure Biosystems Imaging System. Intensities of the protein bands were quantified using ImageJ.

[1] Y. Kamimura, M. Tang, and P. Devreotes, *Methods Mol. Biol. Clifton NJ*, 2009, 571, 255.

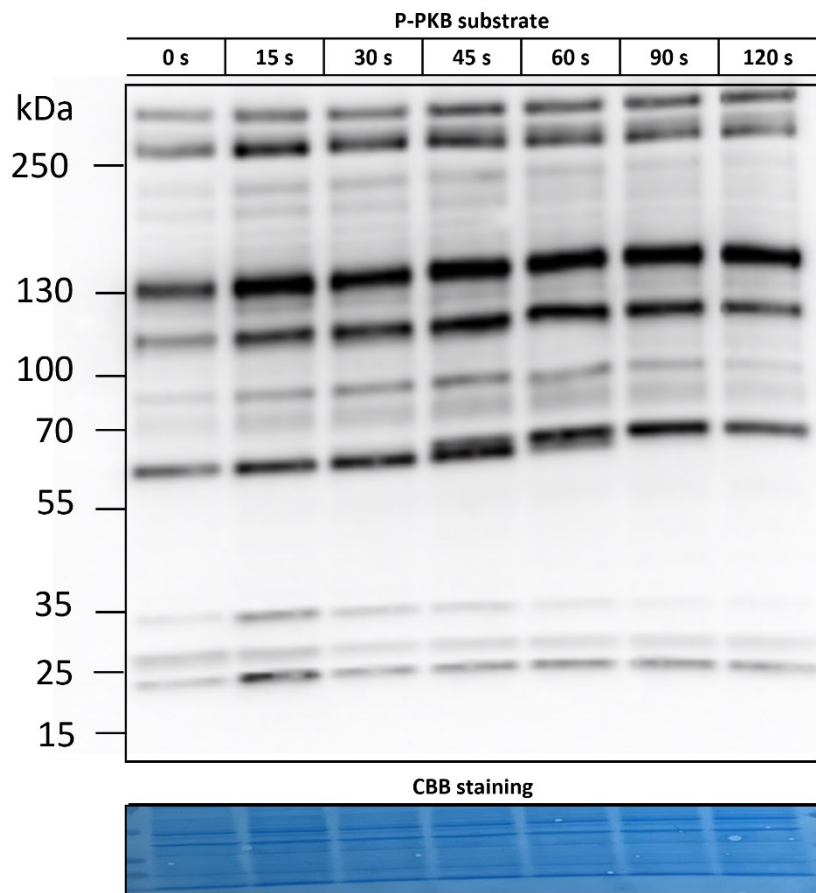

**Figure S1.** Western blot for samples in which cells were lysed at time points 0-120 s after cAMP stimulus.

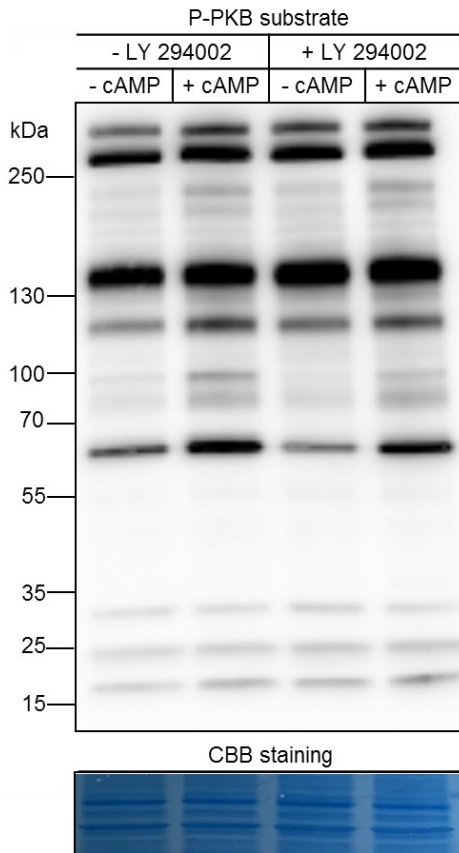

**Figure S2.** Western blot for cell lysates treated with LY294002 and stimulated with cAMP 15-20 s prior to cell lysis along with negative and positive controls.

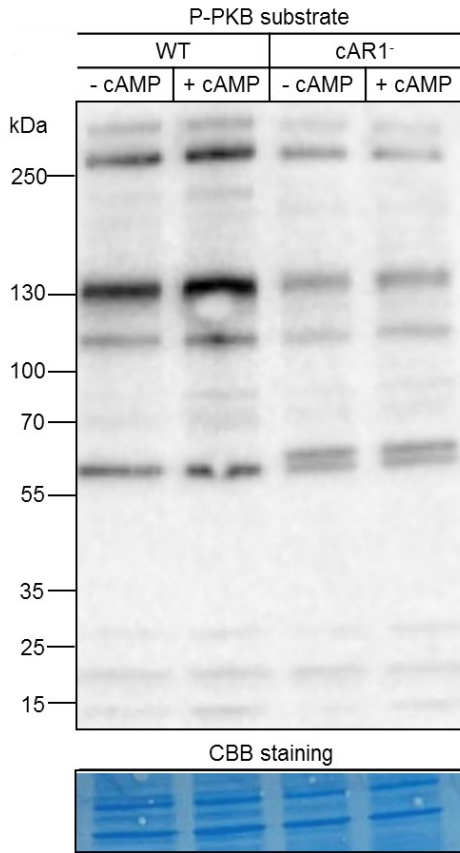

**Figure S3.** Western blot for cell lysates from wild-type (WT) K-AX3 cells and *cARA*- mutant cells that lack the G-protein coupled receptor cAR1.

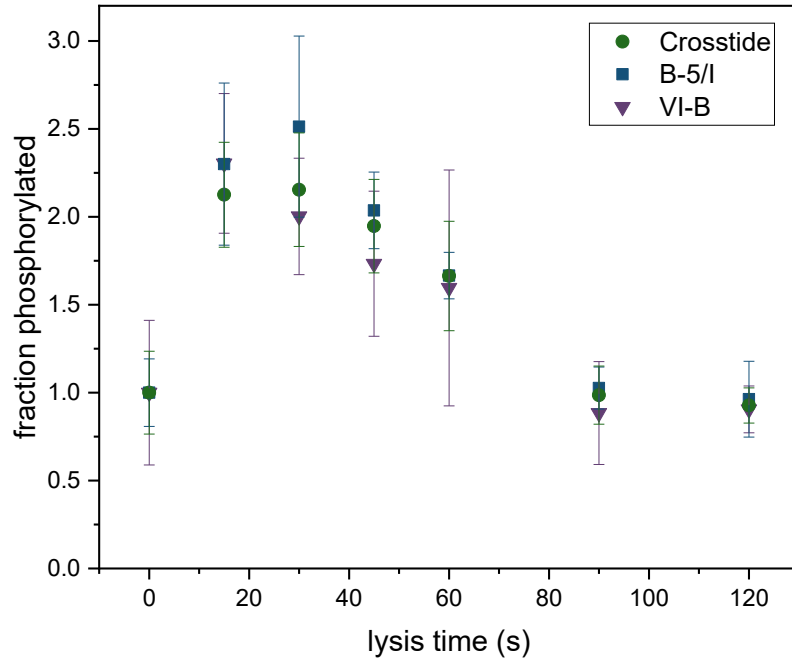

**Figure S4.** Phosphorylation data from Figure 4a presented with each peptide's phosphorylation level normalized to the level observed at time = 0 s, prior to stimulus with cAMP.
